# Supplementary figures and images for: A Literature Review of Learning Collaboratives in Mental Health Care: Used but Untested
Source: Atypon-hosted journal article supplement (doi:10.1176/appi.ps.201300229), 2014-06-02

Figure 1. Article Selection Process

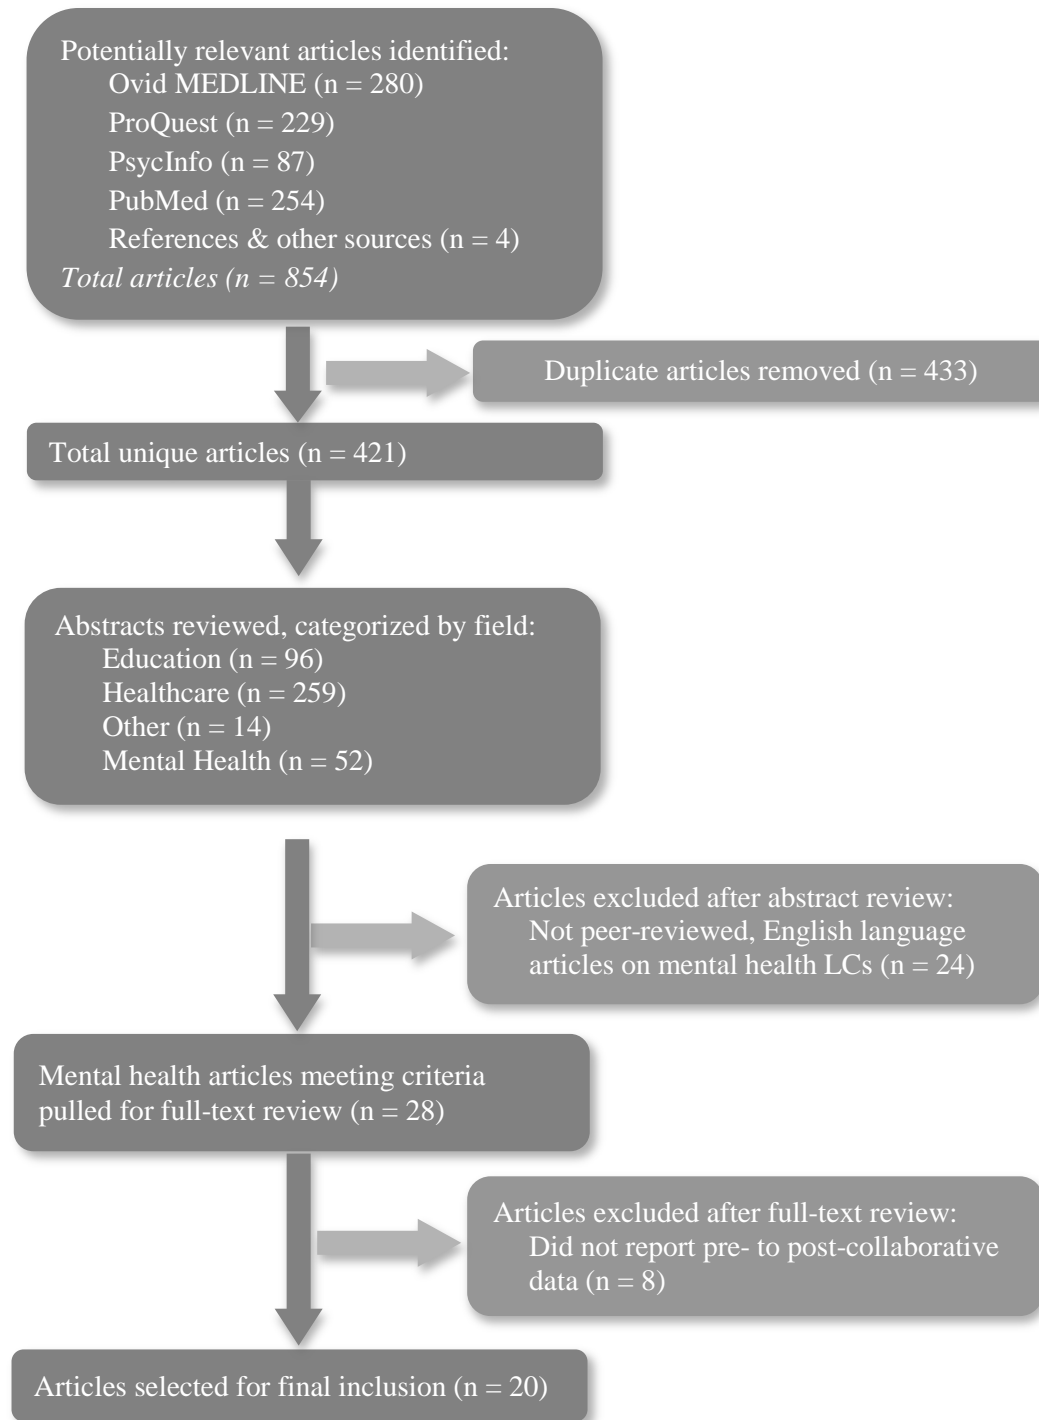

Supplement: 1088_ds001.pdf [file 1088_ds001.pdf]
